# Supplementary material for: The genetic variants in the PTEN/PI3K/AKT pathway predict susceptibility and CE(A)F chemotherapy response to breast cancer and clinical outcomes
Source: PubMed Central journal article supplement (PMC5386760; doi:10.18632/oncotarget.15690), 2017-02-25
Supplement: oncotarget-08-20252-s001.pdf [file oncotarget-08-20252-s001.pdf]

## The genetic variants in the *PTEN/PI3K/AKT* pathway predict susceptibility and CE(A)F chemotherapy response to breast cancer and clinical outcomes

### SUPPLEMENTARY MATERIALS

#### SUPPLEMENTARY TABLES

**Supplementary Table 1: Detailed information of the selected SNPs in PTEN/PI3K/AKT pathway**

| Genes         | Full name                                                              | SNP       | Base change | Chr      | SNP location | MAF    |
|---------------|------------------------------------------------------------------------|-----------|-------------|----------|--------------|--------|
| <i>PTEN</i>   | the phosphatase and tensin homolog deleted on chromosome10             | rs701848  | T/C         | 10q23.31 | 3'-UTR       | 0.3734 |
| <i>PI3KCA</i> | phosphatidylinositol-4,5-bisphosphate 3-kinase catalytic subunit alpha | rs2699887 | G/A         | 3q26.32  | Intron       | 0.1176 |
| <i>AKT1</i>   | AKT serine/threonine kinase 1                                          | rs2494752 | A/G         | 14q32.33 | 5'-UTR       | 0.3299 |

**Supplementary Table 2: Baseline characteristics in patients with breast cancer (cases,  $n=920$ ) and cancer-free controls ( $n=908$ )**

| Variable                           | No. of cases | %    | No. of controls <sup>†</sup> | %    | p <sup>‡</sup> |
|------------------------------------|--------------|------|------------------------------|------|----------------|
| Total no.                          | 880          | 100  | 910                          | 100  |                |
| Median age [range], yrs            | 52[24–75]    |      | 51[22–79]                    |      |                |
| Age, yrs                           |              |      |                              |      |                |
| <52                                | 470          | 53.4 | 495                          | 54.4 | 0.676          |
| ≥52                                | 410          | 46.6 | 415                          | 45.6 |                |
| Menopausal status                  |              |      |                              |      |                |
| Premenopausal                      | 476          | 54.1 | 501                          | 55.1 | 0.682          |
| Postmenopausal                     | 404          | 45.9 | 409                          | 44.9 |                |
| Family history of BC               |              |      |                              |      |                |
| No                                 | 797          | 90.6 |                              |      |                |
| Yes                                | 83           | 9.4  |                              |      |                |
| Histology                          |              |      |                              |      |                |
| IDC                                | 787          | 89.4 |                              |      |                |
| ILC                                | 25           | 2.8  |                              |      |                |
| Others <sup>‡</sup>                | 68           | 7.7  |                              |      |                |
| Tumor size (cm)                    |              |      |                              |      |                |
| ≤ 2.0                              | 197          | 22.4 |                              |      |                |
| >2                                 | 683          | 77.6 |                              |      |                |
| Clinical stages                    |              |      |                              |      |                |
| I or II                            | 561          | 63.7 |                              |      |                |
| III or IV                          | 319          | 36.3 |                              |      |                |
| Lymph node metastasis              |              |      |                              |      |                |
| Node-negative                      | 478          | 54.3 |                              |      |                |
| Node-positive                      | 402          | 45.7 |                              |      |                |
| ER status                          |              |      |                              |      |                |
| Negative                           | 323          | 36.7 |                              |      |                |
| Positive                           | 557          | 63.3 |                              |      |                |
| PR status                          |              |      |                              |      |                |
| Negative                           | 384          | 43.6 |                              |      |                |
| Positive                           | 496          | 56.4 |                              |      |                |
| NCT                                |              |      |                              |      |                |
| CE(A)F regimen                     | 204          | 23.2 |                              |      |                |
| Postoperative therapeutic regimens |              |      |                              |      |                |
| CE(A)F regimen                     | 594          | 67.5 |                              |      |                |
| A(E)T or TAC regimen               | 150          | 17.0 |                              |      |                |
| T or TP regimen                    | 93           | 10.6 |                              |      |                |
| Others                             | 43           | 4.9  |                              |      |                |

Abbreviations: IDC, invasive ductal carcinoma; ILC, invasive lobular carcinoma; ER, Estrogen receptor; PR, Progesterone receptor; NCT, neoadjuvant chemotherapy; CE(A)F, Cyclophosphamide, Epirubicin (Adriamycin) and Fluorouracil; NE, Navelbine and Epirubicin; A(E)T, Adriamycin (Epirubicin) and Taxotere; TAC, Taxotere, Adriamycin and Cyclophosphamide; T, Taxotere; TP, Taxotere and Cisplatin.

<sup>†</sup>Determined using a 2-sided chi-square test.

Supplementary Table 3: Association between *PTEN/PI3K/AKT* pathway polymorphisms and clinicopathological features in BC patients

| Variables             | <i>PTEN</i> rs701848 |      |       |      |                       | <i>PIK3CA</i> rs2699887 |      |       |      |                       | <i>AKT1</i> rs2494752 |      |       |      |                       |
|-----------------------|----------------------|------|-------|------|-----------------------|-------------------------|------|-------|------|-----------------------|-----------------------|------|-------|------|-----------------------|
|                       | TT                   | %    | TC/CC | %    | <i>p</i> <sup>†</sup> | GG                      | %    | GA/AA | %    | <i>p</i> <sup>†</sup> | GG                    | %    | AG/AA | %    | <i>p</i> <sup>†</sup> |
| Age, yrs              |                      |      |       |      |                       |                         |      |       |      |                       |                       |      |       |      |                       |
| <52                   | 111                  | 23.6 | 359   | 76.4 | 0.547                 | 350                     | 74.5 | 120   | 25.5 | 0.184                 | 85                    | 18.1 | 385   | 81.9 | 0.046                 |
| ≥52                   | 104                  | 25.4 | 306   | 74.6 |                       | 321                     | 78.3 | 89    | 21.7 |                       | 54                    | 13.2 | 356   | 86.8 |                       |
| Menopausal status     |                      |      |       |      |                       |                         |      |       |      |                       |                       |      |       |      |                       |
| Premenopausal         | 116                  | 24.4 | 360   | 75.6 | 0.963                 | 355                     | 74.6 | 121   | 25.4 | 0.206                 | 77                    | 16.2 | 399   | 83.8 | 0.737                 |
| Postmenopausal        | 99                   | 24.5 | 305   | 75.5 |                       | 316                     | 78.2 | 88    | 21.8 |                       | 62                    | 15.3 | 342   | 84.7 |                       |
| Family history of BC  |                      |      |       |      |                       |                         |      |       |      |                       |                       |      |       |      |                       |
| No                    | 197                  | 24.7 | 600   | 75.3 | 0.541                 | 607                     | 76.2 | 190   | 23.8 | 0.847                 | 124                   | 15.6 | 673   | 84.4 | 0.550                 |
| Yes                   | 18                   | 21.7 | 65    | 78.3 |                       | 64                      | 77.1 | 19    | 22.9 |                       | 15                    | 18.1 | 68    | 81.9 |                       |
| Histology             |                      |      |       |      |                       |                         |      |       |      |                       |                       |      |       |      |                       |
| IDC                   | 193                  | 24.5 | 594   | 75.5 | 0.982                 | 598                     | 76.0 | 189   | 24.0 | 0.816                 | 127                   | 16.1 | 660   | 83.9 | 0.148                 |
| ILC                   | 6                    | 24.0 | 19    | 76.0 |                       | 19                      | 76.0 | 6     | 24.0 |                       | 6                     | 24.0 | 19    | 76.0 |                       |
| Others                | 16                   | 23.5 | 52    | 76.5 |                       | 54                      | 79.4 | 14    | 20.6 |                       | 6                     | 8.8  | 62    | 91.2 |                       |
| Tumor size (cm)       |                      |      |       |      |                       |                         |      |       |      |                       |                       |      |       |      |                       |
| ≤2.0                  | 53                   | 26.9 | 144   | 73.1 | 0.359                 | 147                     | 74.6 | 50    | 25.4 | 0.542                 | 34                    | 17.3 | 163   | 82.7 | 0.523                 |
| >2                    | 162                  | 23.7 | 521   | 76.3 |                       | 524                     | 76.7 | 159   | 23.3 |                       | 105                   | 15.4 | 578   | 84.6 |                       |
| Clinical stages       |                      |      |       |      |                       |                         |      |       |      |                       |                       |      |       |      |                       |
| I or II               | 135                  | 24.1 | 426   | 75.9 | 0.736                 | 429                     | 76.5 | 132   | 23.5 | 0.838                 | 92                    | 16.4 | 469   | 83.6 | 0.515                 |
| III or IV             | 80                   | 25.1 | 239   | 74.9 |                       | 242                     | 75.9 | 77    | 24.1 |                       | 47                    | 14.7 | 272   | 85.3 |                       |
| Lymph node metastasis |                      |      |       |      |                       |                         |      |       |      |                       |                       |      |       |      |                       |
| Node-negative         | 105                  | 22.0 | 373   | 78.0 | 0.063                 | 357                     | 74.7 | 121   | 25.3 | 0.235                 | 63                    | 13.2 | 415   | 86.8 | 0.020                 |
| Node-positive         | 110                  | 27.4 | 292   | 72.6 |                       | 314                     | 78.1 | 88    | 21.9 |                       | 76                    | 18.9 | 326   | 81.1 |                       |
| ER status             |                      |      |       |      |                       |                         |      |       |      |                       |                       |      |       |      |                       |
| Negative              | 78                   | 24.1 | 245   | 75.9 | 0.882                 | 251                     | 77.7 | 72    | 22.3 | 0.439                 | 52                    | 16.1 | 271   | 83.9 | 0.851                 |
| Positive              | 137                  | 24.6 | 420   | 75.4 |                       | 420                     | 75.4 | 137   | 24.6 |                       | 87                    | 15.6 | 470   | 84.4 |                       |
| PR status             |                      |      |       |      |                       |                         |      |       |      |                       |                       |      |       |      |                       |
| Negative              | 91                   | 23.7 | 293   | 76.3 | 0.656                 | 294                     | 76.6 | 90    | 23.4 | 0.848                 | 64                    | 16.7 | 320   | 83.3 | 0.533                 |
| Positive              | 124                  | 25.0 | 372   | 75.0 |                       | 377                     | 76.0 | 119   | 24.0 |                       | 75                    | 15.1 | 421   | 84.9 |                       |

† *p* value was obtained from two-sided chi-square test.

Supplementary Table 4: Clinicopathological characteristics in patients with NCT

| Characteristics       | CE(A)F regimen |      |
|-----------------------|----------------|------|
|                       | No.            | %    |
| Total no.             |                |      |
| Age, yrs              |                |      |
| <52                   | 97             | 44.1 |
| ≥52                   | 123            | 55.9 |
| Menopausal status     |                |      |
| Premenopausal         | 121            | 55.0 |
| Postmenopausal        | 99             | 45.0 |
| Family history of BC  |                |      |
| No                    | 214            | 97.3 |
| Yes                   | 6              | 2.7  |
| Tumor size (cm)       |                |      |
| ≤ 2.0                 | 6              | 2.7  |
| >2                    | 214            | 97.3 |
| Histology             |                |      |
| IDC                   | 199            | 90.5 |
| ILC                   | 6              | 2.7  |
| Others †              | 15             | 6.8  |
| Clinical stages       |                |      |
| I or II               | 108            | 49.1 |
| III or IV             | 112            | 50.9 |
| Lymph node metastasis |                |      |
| Node-negative         | 126            | 57.3 |
| Node-positive         | 94             | 42.7 |
| ER status             |                |      |
| Negative              | 107            | 48.6 |
| Positive              | 113            | 51.4 |
| PR status             |                |      |
| Negative              | 137            | 62.3 |
| Positive              | 83             | 37.7 |
| Response to NCT       |                |      |
| CR+PR                 | 164            | 74.5 |
| SD+PD                 | 56             | 25.5 |

Abbreviations: IDC, invasive ductal carcinoma; ILC, invasive lobular carcinoma; ER, Estrogen receptor; PR, Progesterone receptor.

Determined using a 2-sided chi-square test.

†Others contains: invasive cribriform carcinoma, medullary carcinoma, and invasive papillary carcinoma.
